# Supplementary material
Source: PubMed Central journal article supplement (PMC5382983)
Supplement: NIHMS850666-supplement-supplement_1.pdf [file NIHMS850666-supplement-supplement_1.pdf]

## FOOD FREQUENCY QUESTIONNAIRE FOR INFANTS

ID Participant \_\_\_\_\_

ID staff \_\_\_\_\_

Date: \_\_\_\_\_ (month/day/year)

### A. Food consumption

In the last 7 days and nights, how many times did your baby eat or drink the following? Include those foods and drinks given to the baby by you and others, such as grandparents, babysitters, and others.

Fill only 1 column for each food:

- If your baby ate a food once per day or more, write the number of times per day in the first column.
- If your baby ate a food less than once a day, write the number of times per week in the second column.
- If your baby did not eat this food in the last week, write 0 in the second column.
- If your baby consumed mixed plates, write each meal separately.

**Check only one column for each food**

| FOODS                                                                                                                                                                                                                                                                               | TIMES PER DAY | TIMES PER WEEK |
|-------------------------------------------------------------------------------------------------------------------------------------------------------------------------------------------------------------------------------------------------------------------------------------|---------------|----------------|
| 1. Breast Milk                                                                                                                                                                                                                                                                      |               |                |
| 2. Formula<br>- Specify brand (e.g. Similac Advance, etc.) _____                                                                                                                                                                                                                    |               |                |
| How did you mix it?<br>___ powder: ___ number of scoops; ___ ounces of water<br>___ concentrated liquid: ___ ounces of formula; ___ ounces of water<br>___ ready to use: ___ ounces                                                                                                 |               |                |
| <b><i>If your baby did not consume any other foods or drinks, go to section B</i></b>                                                                                                                                                                                               |               |                |
| 3. Water                                                                                                                                                                                                                                                                            |               |                |
| 4. Cow's milk<br>- How much did your baby have each time?<br>___4oz. or less   ___ 6oz.   ___8oz.   ___10oz.   ___12oz. or more                                                                                                                                                     |               |                |
| 5. Milk with chocolate/strawberry or vanilla (include frozen beverages, shakes, hot chocolate, etc.)<br>- If you added sugar, how much you added? _____ teaspoons<br>- How much did your baby have each time?<br>___4oz. or less   ___ 6oz.   ___8oz.   ___10oz.   ___12oz. or more |               |                |
| 6. Other milks (example: soy, rice, almond, goat, etc.)<br>- Write most common type consumed this week _____<br>- How much did your baby have each time?<br>___4oz. or less   ___ 6oz.   ___8oz.   ___10oz.   ___12oz. or more                                                      |               |                |
| 7. Cheese                                                                                                                                                                                                                                                                           |               |                |

| FOODS                                                                                                                                                                                                                                                                                                                                                                                 | TIMES PER DAY | TIMES PER WEEK |
|---------------------------------------------------------------------------------------------------------------------------------------------------------------------------------------------------------------------------------------------------------------------------------------------------------------------------------------------------------------------------------------|---------------|----------------|
| 8. Ice cream                                                                                                                                                                                                                                                                                                                                                                          |               |                |
| 9. Yogurt                                                                                                                                                                                                                                                                                                                                                                             |               |                |
| 10. Soy foods: tofu, soy frozen desserts, etc.                                                                                                                                                                                                                                                                                                                                        |               |                |
| 11. Orange juice 100% (no orange beverage)                                                                                                                                                                                                                                                                                                                                            |               |                |
| 12. 100% fruit or vegetable juice (examples: apple, pear, grape, cranberry, carrot, tomato, etc.)<br>- Write the most common consumed _____<br>- Specify type: _____ Juice for babies (example: Gerber, Heinz)<br>_____ Regular juice 100% (not baby juice)<br>- How much did your baby have each time?<br>__2oz. __4oz. __6oz. __8oz. __10oz. or more                                |               |                |
| 13. Other fruit beverages (examples: Hi-C, Space gang, Sunny D, etc.)<br>- How much did your baby have each time?:<br>__2oz. __4oz. __6oz. __8oz. __10oz.                                                                                                                                                                                                                             |               |                |
| 14. Sodas (examples: Coca-Cola, Pepsi, 7-Up, Root beer, etc.)<br>- How much did your baby have each time?:<br>__2oz. __4oz. __6oz. __8oz. __10oz.                                                                                                                                                                                                                                     |               |                |
| 15. Kool-Aid, Tang, Iced Tea (examples: Nestea, Lipton, etc.)<br>- How much did your baby have each time?:<br>__2oz. __4oz. __6oz. __8oz. __10oz.                                                                                                                                                                                                                                     |               |                |
| 16. Hot cereal (examples: baby rice cereal, cream of wheat, oatmeal, corn mush, etc.) <i>ONLY INCLUDE IF EATEN WITH A SPOON</i><br>- Write the most common _____<br>- If you added sugar, ¿How much? _____ teaspoons<br>- How much did your baby eat each time? USE THE PICTURES<br>__1oz. (2 tbsp.) __2.5oz. (5 tbsp.) __4oz. (½ cup/8tbsp.)<br>__6oz. (¾ cup/10tbsp.) __8oz. (1cup) |               |                |
| 17. Baby cereal added to the bottle (examples: baby rice, wheat or corn cereal, mixed cereals, etc.)<br>- How many scoops/teaspoons did you add to the bottle each time? _____                                                                                                                                                                                                        |               |                |
| 18. Ready to eat breakfast cereals (examples: Frosted flakes, Fruity Pebbles, etc.)<br>- Write the most common _____<br>- How much did your baby eat each time? USE THE PICTURES<br>__1oz. (2 tbsp.) __2.5oz. (5 tbsp.) __4oz. (½ cup/8tbsp.)<br>__6oz. (¾ cup/10tbsp.) __8oz. (1cup)                                                                                                 |               |                |
| 19. Rice and pasta<br>- Specify most common type: _____Regular _____ Whole grain<br>- How much did your baby eat each time? USE THE PICTURES<br>__1oz. (2 tbsp.) __2.5oz. (5 tbsp.) __4oz. (½ cup/8tbsp.)<br>__6oz. (¾ cup/10tbsp.) __8oz. (1cup)                                                                                                                                     |               |                |
| 20. Bread (examples: sandwich bread, dinner roll, bagel, French bread, tortilla...)<br>- Specify most common type: _____Regular _____ Whole grain                                                                                                                                                                                                                                     |               |                |

| FOODS                                                                                                                                                                                                                                                                                                                                                                                                                                                                                  | TIMES PER DAY | TIMES PER WEEK |
|----------------------------------------------------------------------------------------------------------------------------------------------------------------------------------------------------------------------------------------------------------------------------------------------------------------------------------------------------------------------------------------------------------------------------------------------------------------------------------------|---------------|----------------|
| 21. Pancake, waffles, French toast, cinnamon rolls, etc.<br>- Specify most common type: ___ Regular ___ Whole grain                                                                                                                                                                                                                                                                                                                                                                    |               |                |
| 22. Crackers (examples: soda, Ritz, Cheese-it, etc.)<br>- Specify most common type: ___ Regular ___ Whole grain                                                                                                                                                                                                                                                                                                                                                                        |               |                |
| 23. Pizza, turnovers, tacos, other fried foods, etc.                                                                                                                                                                                                                                                                                                                                                                                                                                   |               |                |
| <p>How much of breads, pancakes, crackers, pizza did your baby eat each time? USE THE PICTURES</p> <p>___ ½ slice of bread / ½ pancake/waffle (4") / 2 crackers / ¼ slice of medium pizza</p> <p>___ ¾ slice of bread / ¾ pancake/waffle (4") / 3 crackers / 1/3 slice of medium pizza</p> <p>___ 1 slice of bread / 1 pancake/waffle (4") / 4 crackers / ½ slice of medium pizza</p> <p>___ 1.5 slice of bread / 1.5 pancake/waffle (4") / 5 crackers / 2/3 slice of medium pizza</p> |               |                |
| 24. Banana<br>- Specify the most common: ___ fresh ___ baby food                                                                                                                                                                                                                                                                                                                                                                                                                       |               |                |
| 25. Apple<br>- Specify the most common: ___ fresh ___ baby food ___ jar/canned                                                                                                                                                                                                                                                                                                                                                                                                         |               |                |
| 26. Pear<br>- Specify the most common: ___ fresh ___ baby food ___ jar/canned                                                                                                                                                                                                                                                                                                                                                                                                          |               |                |
| 27. Citrus fruits (examples: orange, mandarin, etc.)<br>- Specify the most common: ___ fresh ___ baby food ___ jar/canned                                                                                                                                                                                                                                                                                                                                                              |               |                |
| 28. Melon<br>- Specify the most common: ___ fresh ___ baby food                                                                                                                                                                                                                                                                                                                                                                                                                        |               |                |
| 29. Mango and papaya<br>- Specify the most common: ___ fresh ___ baby food                                                                                                                                                                                                                                                                                                                                                                                                             |               |                |
| 30. Other fruits, specify: _____<br>- Specify the most common: ___ fresh ___ baby food ___ jar/canned                                                                                                                                                                                                                                                                                                                                                                                  |               |                |
| <p>How much of any type of fruit did your baby eat each time? USE THE PICTURES</p> <p>___ 1oz. (2 tbsp.) ___ 2.5oz. (5 tbsp.) ___ 4oz. (½ cup/8tbsp.) ___ 6oz. (¾ cup/10tbsp.) ___ 8oz. (1cup)</p>                                                                                                                                                                                                                                                                                     |               |                |
| 31. Carrot<br>- Specify the most common:<br>___ raw or cooked at home ___ baby food ___ jar/canned/frozen                                                                                                                                                                                                                                                                                                                                                                              |               |                |
| 32. Green beans<br>- Specify the most common:<br>___ raw or cooked at home ___ baby food ___ jar/canned/frozen                                                                                                                                                                                                                                                                                                                                                                         |               |                |
| 33. Corn<br>- Specify the most common:<br>___ raw or cooked at home ___ baby food ___ jar/canned/frozen                                                                                                                                                                                                                                                                                                                                                                                |               |                |
| 34. Pumpkin/squash<br>- Specify the most common:<br>___ raw or cooked at home ___ baby food ___ jar/canned/frozen                                                                                                                                                                                                                                                                                                                                                                      |               |                |

| FOODS                                                                                                                                                                                                                                                                                                                             | TIMES PER DAY | TIMES PER WEEK |
|-----------------------------------------------------------------------------------------------------------------------------------------------------------------------------------------------------------------------------------------------------------------------------------------------------------------------------------|---------------|----------------|
| 35. Other vegetables (examples: tomato, lettuce, broccoli, etc.)<br>- Specify the most common:<br>___ raw or cooked at home   ___ baby food   ___ jar/canned/frozen                                                                                                                                                               |               |                |
| How much of any type of vegetables did your baby eat each time? <i>USE THE PICTURES</i><br>___ 1oz. (2 tbsp.)   ___ 2.5oz. (5 tbsp.)   ___ 4oz. (½ cup/8tbsp.)   ___ 6oz. (¾ cup/10tbsp.)   ___ 8oz. (1cup)                                                                                                                       |               |                |
| 36. Potato or sweet potato                                                                                                                                                                                                                                                                                                        |               |                |
| 37. French fries                                                                                                                                                                                                                                                                                                                  |               |                |
| 38. Plantain                                                                                                                                                                                                                                                                                                                      |               |                |
| 39. Other starchy vegetables (yucca, cassava, yautia, celery, breadfruit)                                                                                                                                                                                                                                                         |               |                |
| 40. Beans, pigeon peas, chickpeas, etc.                                                                                                                                                                                                                                                                                           |               |                |
| 41. Beef or pork (includes hot dogs, sausage; baby foods)                                                                                                                                                                                                                                                                         |               |                |
| 42. Chicken or turkey (any preparation, includes ham, canned, baby food)                                                                                                                                                                                                                                                          |               |                |
| 43. Canned fish (examples: tuna fish or salmon)                                                                                                                                                                                                                                                                                   |               |                |
| 44. Other fish                                                                                                                                                                                                                                                                                                                    |               |                |
| 45. Egg (whole, egg white or yolk)                                                                                                                                                                                                                                                                                                |               |                |
| 46. Peanuts, peanut butter and other nuts                                                                                                                                                                                                                                                                                         |               |                |
| How much of beans, meat, chicken, fish, eggs or any nuts did your baby eat each time? <i>USE PICTURES</i><br>___ 1oz. (2 tbsp.)   ___ 2.5oz. (5 tbsp.)   ___ 4oz. (½ cup/8tbsp.)   ___ 6oz. (¾ cup/10tbsp.)   ___ 8oz. (1cup)                                                                                                     |               |                |
| 47. Candies (chocolate, bonbon, lolly pop, etc.)                                                                                                                                                                                                                                                                                  |               |                |
| 48. Cake, muffins, donuts, etc.                                                                                                                                                                                                                                                                                                   |               |                |
| 49. Cookies (sugar cookies, chocolate chips, oats, etc.)                                                                                                                                                                                                                                                                          |               |                |
| 50. Others candies/sweets; Specify: _____                                                                                                                                                                                                                                                                                         |               |                |
| How much of cookies, cakes, muffins or donuts did your baby eat each time? <i>USE THE PICTURES</i><br>___ 1 cookie / ¼ piece of cake / ¼ muffin / ¼ donut<br>___ 2 cookies / ½ piece of cake / ½ muffin / ½ donut<br>___ 3 cookies / ¾ piece of cake / ¾ muffin / ¾ donut<br>___ 4 cookies / 1 piece of cake / 1 muffin / 1 donut |               |                |
| 51. Honey, jam, syrup, agave<br>- How much your baby ate each time? <i>USE THE PICTURES</i><br>___ ½ tsp (¼ oz.)   ___ 1 tsp (½ oz.)   ___ 2 tbsp. (1 oz.)   ___ 3 tbsp. (1.5 oz.)                                                                                                                                                |               |                |
| 52. Chips (examples: Doritos, Lays, Cheetos, Tostitos, etc.)<br>- How much of chips your baby ate each time?<br>___ ¼ oz. or ¼ of a bag   ___ ½ oz. or ½ of a bag   ___ 1 oz. or 1 bag<br>___ 2 oz. or a medium bag   ___ 3 oz. or 30 chips   ___ 4 oz. or 40 chips                                                               |               |                |
| 53. Margarine/butter                                                                                                                                                                                                                                                                                                              |               |                |
| 54. Oil                                                                                                                                                                                                                                                                                                                           |               |                |

**B. Use of vitamin and mineral supplements.** ¿How often did you give your baby any of these supplements in the last 7 days? Mark with an X one frequency for each supplement

| <b>Supplements</b>                                    | <b>No</b> | <b>1-3 times per week</b> | <b>4-6 times per week</b> | <b>1 per day</b> | <b>2 per day</b> |
|-------------------------------------------------------|-----------|---------------------------|---------------------------|------------------|------------------|
| 1. Iron drops                                         |           |                           |                           |                  |                  |
| 2. Fluorine drops                                     |           |                           |                           |                  |                  |
| 3. Vitamin D drops                                    |           |                           |                           |                  |                  |
| 4. Folic acid                                         |           |                           |                           |                  |                  |
| 5. Multi-vitamins for babies<br>- Specify name: _____ |           |                           |                           |                  |                  |

**Supplementary Table 1. Energy and nutrients intakes in the first and second administration of the FFQ and the first and second administration of the 24-h recall in a sample of infants and toddlers' participants of the WIC program in Puerto Rico (N=241)**

| Variable                | FFQ 1                                                    | FFQ 2             | Spearman's correlation | 24-h recall 1                                            | 24-h recall 2     | Spearman's correlation |
|-------------------------|----------------------------------------------------------|-------------------|------------------------|----------------------------------------------------------|-------------------|------------------------|
|                         | Median (25 <sup>th</sup> , 75 <sup>th</sup> percentiles) |                   | r (95% CI)             | Median (25 <sup>th</sup> , 75 <sup>th</sup> percentiles) |                   | r (95% CI)             |
| Energy (kcal)           | 1055 (653, 1640)                                         | 1036 (697, 1544)  | 0.71 (0.64, 0.77)      | 824 (602, 1109)                                          | 834 (604, 1099)   | 0.74 (0.68, 0.79)      |
| Protein (g)             | 35.6 (31.9, 41.0)                                        | 29.4 (22.2, 36.8) | 0.57 (0.47, 0.65)      | 24.5 (21.2, 31.3)                                        | 24.9 (22.1, 29.9) | 0.58 (0.49, 0.66)      |
| Carbohydrate (g)        | 160 (154, 181)                                           | 155 (122, 186)    | 0.43 (0.32, 0.53)      | 117 (109, 134)                                           | 119 (110, 135)    | 0.53 (0.43, 0.61)      |
| Fat (g)                 | 51.9 (43.2, 54.3)                                        | 45.4 (35.7, 53.5) | 0.46 (0.35, 0.55)      | 37.3 (29.1, 43.4)                                        | 37.3 (29.4, 42.9) | 0.56 (0.47, 0.64)      |
| Saturated fat (g)       | 21.8 (17.6, 23.1)                                        | 19.1 (14.4, 22.2) | 0.43 (0.32, 0.53)      | 15.7 (12.0, 19.2)                                        | 15.8 (12.7, 18.7) | 0.62 (0.53, 0.69)      |
| Monounsaturated fat (g) | 17.3 (14.1, 18.7)                                        | 14.9 (11.7, 18.9) | 0.49 (0.39, 0.58)      | 12.3 (8.74, 15.7)                                        | 12.4 (9.37, 15.7) | 0.6 (0.51, 0.67)       |
| Polyunsaturated fat (g) | 8.98 (7.85, 10.7)                                        | 8.82 (6.23, 11.0) | 0.51 (0.41, 0.6)       | 5.71 (5.10, 7.43)                                        | 5.86 (4.43, 7.62) | 0.61 (0.53, 0.69)      |
| Omega 3 Fatty acids (g) | 0.77 (0.56, 0.96)                                        | 0.80 (0.51, 1.05) | 0.65 (0.57, 0.72)      | 0.61 (0.51, 0.80)                                        | 0.59 (0.48, 0.78) | 0.56 (0.46, 0.64)      |
| Fiber (g)               | 7.34 (6.12, 11.0)                                        | 7.15 (3.02, 11.3) | 0.45 (0.34, 0.54)      | 4.24 (3.26, 7.16)                                        | 4.22 (3.01, 7.33) | 0.54 (0.44, 0.62)      |
| Vitamin A-Retinol (µg)  | 771 (645, 927)                                           | 664 (483, 892)    | 0.55 (0.45, 0.64)      | 513 (411, 590)                                           | 504 (400, 592)    | 0.53 (0.43, 0.61)      |
| Vitamin D (µg)          | 11.2 (7.13, 15.2)                                        | 10.4 (5.80, 14.6) | 0.66 (0.58, 0.73)      | 6.24 (2.48, 8.99)                                        | 6.06 (2.86, 8.72) | 0.8 (0.75, 0.84)       |
| Vitamin E (mg)          | 7.27 (4.86, 11.5)                                        | 7.58 (4.78, 11.2) | 0.68 (0.6, 0.74)       | 3.41 (1.86, 7.19)                                        | 3.62 (1.67, 7.10) | 0.79 (0.74, 0.84)      |

|                  |                   |                   |                   |                   |                   |                   |
|------------------|-------------------|-------------------|-------------------|-------------------|-------------------|-------------------|
| Vitamin K (µg)   | 52.2 (24.6, 78.3) | 46.5 (22.4, 76.1) | 0.62 (0.53, 0.69) | 26.6 (7.76, 57.1) | 26.6 (7.67, 52.4) | 0.74 (0.67, 0.79) |
| Vitamin C (mg)   | 111 (94.7, 137)   | 93.3 (58.8, 126)  | 0.57 (0.47, 0.65) | 75.4 (44.8, 89.8) | 67.8 (45.6, 86.6) | 0.48 (0.38, 0.57) |
| Vitamin B1 (mg)  | 1.06 (0.86, 1.19) | 0.95 (0.67, 1.16) | 0.66 (0.58, 0.73) | 0.71 (0.48, 0.86) | 0.71 (0.48, 0.88) | 0.62 (0.54, 0.7)  |
| Vitamin B2 (mg)  | 1.55 (1.26, 1.87) | 1.29 (0.81, 1.71) | 0.64 (0.55, 0.71) | 0.93 (0.71, 1.24) | 0.97 (0.72, 1.23) | 0.66 (0.58, 0.72) |
| Vitamin B3 (mg)  | 11.9 (8.68, 14.6) | 10.5 (7.62, 14.0) | 0.65 (0.57, 0.72) | 8.36 (5.07, 10.7) | 8.76 (5.28, 10.7) | 0.43 (0.32, 0.53) |
| Vitamin B5 (mg)  | 4.80 (3.95, 5.51) | 4.22 (3.05, 5.20) | 0.64 (0.56, 0.71) | 3.32 (2.81, 3.85) | 3.22 (2.68, 3.72) | 0.71 (0.64, 0.77) |
| Vitamin B6 (mg)  | 1.02 (0.85, 1.22) | 0.97 (0.67, 1.32) | 0.47 (0.36, 0.56) | 0.73 (0.49, 0.89) | 0.72 (0.51, 0.89) | 0.46 (0.36, 0.56) |
| Vitamin B9 (µg)  | 268 (243, 326)    | 223 (170, 302)    | 0.36 (0.24, 0.47) | 138 (105, 168)    | 143 (115, 173)    | 0.48 (0.38, 0.57) |
| Vitamin B12 (µg) | 3.95 (3.48, 4.65) | 3.19 (2.40, 4.56) | 0.41 (0.3, 0.52)  | 2.10 (1.38, 2.82) | 2.33 (1.46, 2.87) | 0.64 (0.56, 0.71) |
| Calcium (mg)     | 949 (827, 1108)   | 794 (571, 1023)   | 0.58 (0.49, 0.66) | 605 (475, 757)    | 593 (484, 756)    | 0.62 (0.54, 0.69) |
| Phosphorus (mg)  | 736 (647, 872)    | 616 (455, 869)    | 0.62 (0.53, 0.69) | 493 (388, 643)    | 489 (399, 647)    | 0.68 (0.6, 0.74)  |
| Magnesium (mg)   | 151 (140, 186)    | 137 (102, 184)    | 0.4 (0.29, 0.5)   | 107 (82.4, 131)   | 103 (79.8, 131)   | 0.62 (0.53, 0.69) |
| Iron (mg)        | 12.9 (8.79, 18.5) | 11.4 (6.49, 17.4) | 0.63 (0.55, 0.7)  | 8.52 (4.04, 12.8) | 8.38 (4.04, 13.2) | 0.73 (0.66, 0.78) |
| Zinc (mg)        | 8.05 (6.20, 10.0) | 6.88 (4.71, 9.3)  | 0.65 (0.57, 0.72) | 4.77 (3.42, 6.17) | 4.99 (3.55, 6.28) | 0.63 (0.55, 0.7)  |
| Copper (mg)      | 0.95 (0.83, 1.09) | 0.86 (0.68, 1.07) | 0.61 (0.52, 0.68) | 0.66 (0.60, 0.74) | 0.65 (0.58, 0.75) | 0.5 (0.4, 0.59)   |
| Potassium (mg)   | 1636 (1533, 1979) | 1497 (1130, 2008) | 0.49 (0.38, 0.58) | 1163 (961, 1417)  | 1149 (952, 1390)  | 0.52 (0.42, 0.61) |

---

**Supplementary Table 2. Food groups intakes in the first and second administration of the FFQ and the first and second administration of the 24-h recall in a sample of infants and toddlers' participants of the WIC program in Puerto Rico (N=241)**

| Variable                              | FFQ 1                                                    | FFQ 2             | Spearman's correlation | 24-h recall 1                                            | 24-h recall 2     | Spearman's correlation |
|---------------------------------------|----------------------------------------------------------|-------------------|------------------------|----------------------------------------------------------|-------------------|------------------------|
|                                       | Median (25 <sup>th</sup> , 75 <sup>th</sup> percentiles) |                   | r (95% CI)             | Median (25 <sup>th</sup> , 75 <sup>th</sup> percentiles) |                   | r (95% CI)             |
| Breast-milk (ml)                      | 105 (4.13, 444)                                          | 84.7 (20.6, 466)  | 0.75 (0.69, 0.80)      | 40.8 (15.7, 595)                                         | 26.9 (21.1, 563)  | 0.78 (0.73, 0.83)      |
| Formula (ml)                          | 33.5 (0.63, 604)                                         | 90.3 (9.89, 733)  | 0.76 (0.70, 0.81)      | 607 (155, 824)                                           | 584 (156, 787)    | 0.78 (0.73, 0.83)      |
| Milk (ml)                             | 284 (82.2, 428)                                          | 133 (25.6, 348)   | 0.69 (0.62, 0.75)      | 146 (39.6, 218)                                          | 155 (45.7, 246)   | 0.68 (0.61, 0.74)      |
| Formula or milk (ml)                  | 639 (352, 921)                                           | 615 (266, 899)    | 0.64 (0.56, 0.71)      | 778 (545, 908)                                           | 752 (532, 864)    | 0.68 (0.61, 0.74)      |
| Cheese (serving)                      | 0.18 (0.03, 0.25)                                        | 0.13 (0.04, 0.21) | 0.38 (0.27, 0.49)      | 0.03 (0.03, 0.08)                                        | 0.09 (0.02, 0.17) | 0.40 (0.29, 0.50)      |
| Ice cream & yogurt (serving)          | 0.15 (0.03, 0.19)                                        | 0.12 (0.02, 0.15) | 0.59 (0.49, 0.66)      | 0.03 (0.02, 0.07)                                        | 0.03 (0.02, 0.06) | 0.55 (0.45, 0.63)      |
| Juice (100%) (ml)                     | 138 (41.4, 173)                                          | 89.3 (37.4, 146)  | 0.33 (0.21, 0.44)      | 50.1 (12.5, 98.8)                                        | 43.2 (12.6, 96.1) | 0.45 (0.35, 0.55)      |
| Sugary sweetened beverages (SSB) (ml) | 8.79 (1.69, 15.9)                                        | 14.3 (5.27, 31.4) | 0.44 (0.33, 0.54)      | 4.38 (1.96, 8.80)                                        | 9.93 (2.30, 16.4) | 0.41 (0.30, 0.51)      |
| Juice (100%) or SSB (ml)              | 152 (59.7, 195)                                          | 112 (51.9, 166)   | 0.35 (0.23, 0.46)      | 60.7 (19.7, 111)                                         | 60.4 (27.5, 120)  | 0.56 (0.47, 0.64)      |
| Refined grains (cereals, rice, pasta) | 0.97 (0.54, 1.20)                                        | 0.85 (0.44, 1.16) | 0.39 (0.27, 0.49)      | 0.87 (0.44, 1.50)                                        | 0.99 (0.53, 1.61) | 0.43 (0.32, 0.52)      |



(serving)

Whole grains

(cereals, rice, pasta) 0.15 (0.00, 0.22) 0.03 (0.00, 0.06) 0.19 (0.06, 0.31) 0.34 (0.10, 0.74) 0.27 (0.10, 0.78) 0.36 (0.25, 0.47)

(serving)

Fruits (serving) 0.56 (0.38, 1.37) 0.51 (0.23, 0.89) 0.38 (0.27, 0.49) 0.24 (0.08, 0.72) 0.21 (0.08, 0.66) 0.42 (0.31, 0.52)

Vegetables

(serving) 0.36 (0.18, 0.90) 0.36 (0.19, 0.80) 0.45 (0.34, 0.55) 0.11 (0.05, 0.77) 0.14 (0.05, 0.49) 0.29 (0.16, 0.40)

Starchy roots

(serving) 0.06 (0.02, 0.10) 0.07 (0.03, 0.11) 0.36 (0.24, 0.47) 0.13 (0.00, 0.20) 0.10 (0.01, 0.15) 0.41 (0.30, 0.51)

Beans (serving) 0.27 (0.09, 0.36) 0.21 (0.07, 0.28) 0.43 (0.31, 0.52) 0.06 (0.00, 0.09) 0.04 (0.00, 0.07) 0.28 (0.16, 0.40)

Meats (serving) 0.41 (0.15, 0.52) 0.37 (0.11, 0.52) 0.52 (0.41, 0.60) 0.75 (0.31, 1.26) 0.75 (0.21, 1.22) 0.33 (0.21, 0.44)

Eggs (unit) 0.33 (0.06, 0.51) 0.14 (0.02, 0.25) 0.48 (0.37, 0.57) 0.02 (0.02, 0.06) 0.04 (0.02, 0.07) 0.56 (0.46, 0.64)

Nuts and seeds

(serving) 0.07 (0.05, 0.16) 0.09 (0.06, 0.20) 0.57 (0.48, 0.65) 0.00 (0.00, 0.00) 0.00 (0.00, 0.00) 0.67 (0.60, 0.74)

Sweets (serving) 0.54 (0.09, 0.88) 0.48 (0.07, 0.86) 0.50 (0.39, 0.59) 0.18 (0.02, 0.30) 0.18 (0.01, 0.28) 0.27 (0.15, 0.38)

Salty snacks

(serving) 0.01 (0.00, 0.01) 0.02 (0.01, 0.05) 0.51 (0.40, 0.60) 0.00 (0.01, 0.02) 0.02 (0.03, 0.06) 0.73 (0.66, 0.78)

Added fat (serving) 0.29 (0.07, 0.37) 0.42 (0.15, 0.70) 0.30 (0.18, 0.41) 0.46 (0.10, 0.67) 0.45 (0.11, 0.64) 0.35 (0.23, 0.46)

---

**Supplementary Table 3. Agreement between methods for energy and nutrient quartiles in a sample of infants and toddlers' participants of the WIC program in Puerto Rico (N=241)**

| <b>Variable</b>                     | <b>Correctly classified (%)</b> | <b>Classified within one quartile (%)</b> | <b>Grossly misclassified (%)</b> |
|-------------------------------------|---------------------------------|-------------------------------------------|----------------------------------|
| Energy (kcal)                       | 52.7                            | 38.6                                      | 8.70                             |
| Protein (g)                         | 44.8                            | 33.6                                      | 21.6                             |
| Carbohydrate (g)                    | 36.5                            | 41.9                                      | 21.6                             |
| Fat (g)                             | 42.3                            | 39.8                                      | 17.8                             |
| Saturated fat (g)                   | 37.8                            | 39.0                                      | 23.2                             |
| Monounsaturated fat (g)             | 36.9                            | 43.6                                      | 19.5                             |
| Polyunsaturated fat (g)             | 53.5                            | 30.7                                      | 15.8                             |
| Omega 3 Fatty acids (g)             | 39.4                            | 45.6                                      | 14.9                             |
| Fiber (g)                           | 39.0                            | 37.8                                      | 23.2                             |
| Vitamin A-Retinol ( $\mu\text{g}$ ) | 42.7                            | 34.9                                      | 22.4                             |
| Vitamin D ( $\mu\text{g}$ )         | 56.0                            | 35.7                                      | 8.30                             |
| Vitamin E (mg)                      | 43.6                            | 49.4                                      | 7.10                             |
| Vitamin K ( $\mu\text{g}$ )         | 46.5                            | 44.4                                      | 9.10                             |
| Vitamin C (mg)                      | 54.4                            | 28.2                                      | 17.4                             |
| Vitamin B1 (mg)                     | 47.3                            | 40.7                                      | 12.0                             |

|                  |      |      |      |
|------------------|------|------|------|
| Vitamin B2 (mg)  | 48.6 | 34.4 | 17.0 |
| Vitamin B3 (mg)  | 38.6 | 43.2 | 18.3 |
| Vitamin B5 (mg)  | 47.7 | 39.8 | 12.5 |
| Vitamin B6 (mg)  | 46.1 | 33.2 | 20.8 |
| Vitamin B9 (µg)  | 37.3 | 38.2 | 24.5 |
| Vitamin B12 (µg) | 37.3 | 43.2 | 19.5 |
| Calcium (mg)     | 42.7 | 39.4 | 17.8 |
| Phosphorus (mg)  | 45.6 | 35.3 | 19.1 |
| Magnesium (mg)   | 35.7 | 43.2 | 21.2 |
| Iron (mg)        | 39.0 | 49.8 | 11.2 |
| Zinc (mg)        | 50.2 | 42.3 | 7.50 |
| Copper (mg)      | 25.7 | 44.4 | 29.9 |
| Potassium (mg)   | 35.7 | 41.9 | 22.4 |

---
